# Supplementary material for: Chromosomally unstable tumor cells specifically require KIF18A for proliferation
Source: PubMed Central journal article supplement (PMC7900194; doi:10.1038/s41467-021-21447-2), 2021-02-22
Supplement: 41467_2021_21447_MOESM2_ESM.pdf [file 41467_2021_21447_MOESM2_ESM.pdf]

**Editorial Note:** This manuscript has been previously reviewed at another journal that is not operating a transparent peer review scheme. The manuscript was considered suitable for publication without further review at Nature Communications.
